# Supplementary material for: Synergistic influence of mesoporous spinel nickel ferrite on the electrocatalytic activity of nano-structured palladium
Source: Royal Society of Chemistry journal article supplement (doi:10.1039/d0ra10944d), 2021-01-01
Supplement: d0ra10944d1.pdf [file d0ra10944d1.pdf]

Supporting information

## **Synergistic Influence of Spinel Nickel Ferrite Mesoporous on Electrocatalytic Activity of Nano-Structured Palladium**

Fariba Kaedi<sup>1</sup>, Zahra Yavari\*<sup>1,2</sup>, Ahmad Reza Abbasian<sup>3</sup>, Milad Asmaei<sup>3</sup>, Kagan Kerman<sup>4</sup>, Meissam Noroozifar\*<sup>4</sup>

*1. Department of Chemistry, University of Sistan and Baluchestan, Zahedan, P.O. Box 98135-674, Iran*

*2. Renewable Energies Research Institute, University of Sistan and Baluchestan, Zahedan, Iran*

*3. Department of Materials Engineering, Faculty of Engineering, University of Sistan and Baluchestan, Zahedan, Iran*

*4. Department of Physical and Environmental Sciences, University of Toronto Scarborough 1265 Military Trail, Toronto, Ontario, M1C 1A4, Canada*

\*Corresponding Authors: Tel.: +98-54-3341-6464; Fax: +98-54-3341-6888.

z\_yavari@chem.usb.ac.ir; ORCID: 0000-0003-1049-0448

ahmadabbassian@gmail.com; ORCID: 0000-0002-8560-289X

m.noroozifar@utoronto.ca; ORCID:0000-0001-7997-0461

| Solution | Electrode                                       | GCE/PdNS              |                        | GCE/PdNS-SNFM         |                        |
|----------|-------------------------------------------------|-----------------------|------------------------|-----------------------|------------------------|
|          |                                                 | 1 <sup>th</sup> cycle | 80 <sup>th</sup> cycle | 1 <sup>th</sup> cycle | 80 <sup>th</sup> cycle |
| 1 M NaOH | $Q_H^a$ (mC.cm <sup>-2</sup> )                  | 4.00                  | 2.67                   | 104.18                | 103.28                 |
|          | $EAS_H^b$ (m <sup>2</sup> .g <sup>-1</sup> )    | 3.07                  | 2.05                   | 82.18                 | 79.32                  |
|          | $D_{Pd}^c \times 10^{-4}$                       | 22.02                 | 14.71                  | 590.12                | 569.59                 |
|          | % loss <sub>ADT<sub>H</sub></sub> <sup>d</sup>  | 33.22                 |                        | 1.26                  |                        |
|          | $Q_{Pd}$ (mC.cm <sup>-2</sup> )                 | 7.05                  | 4.01                   | 127.39                | 122.36                 |
|          | $EAS_{Pd}^e$ (m <sup>2</sup> .g <sup>-1</sup> ) | 3.19                  | 2.88                   | 101.46                | 79.32                  |
|          | % loss <sub>ADT<sub>Pd</sub></sub> <sup>f</sup> | 9.72                  |                        | 3.94                  |                        |

a.  $Q_H = \frac{Q_H' + Q_H''}{2}$  {electrochemically desorption ( $Q_H'$ ) and adsorption ( $Q_H''$ ) of H<sub>2</sub> molecules on the Pd sites}

b.  $EAS_H = \frac{Q_H}{k \times l_{Pd}}$  { $k = 0.420$  mC.cm<sup>-2</sup> and  $l_{Pd} = 0.310$  mg.cm<sup>-2</sup>}

c.  $D_{Pd} = \frac{1}{M_{Pd}} \times (N_A \times 4\pi \times r_{Pd}^2)$  { $M_{Pd} = 106.42$  g.mol<sup>-1</sup>,  $N_A = 6.02 \times 10^{23}$  mol<sup>-1</sup> and  $r_{Pd} = 0.14 \times 10^{-9}$  m}

d.  $\%loss_{ADT_H} = \frac{(EAS_{H_{1^{th}cycle}} - EAS_{H_{150^{th}cycle}})}{EAS_{H_{1^{th}cycle}}} \times 100$

e.  $EAS_{Pd} = \frac{Q_{Pd}}{s \times l_{Pd}}$  { $s = 0.405$  mC.cm<sup>-2</sup> and  $l_{Pd} = 0.310$  mg.cm<sup>-2</sup>}

f.  $\%loss_{ADT_{Pd}} = \frac{(EAS_{Pd_{1^{th}cycle}} - EAS_{Pd_{150^{th}cycle}})}{EAS_{Pd_{1^{th}cycle}}} \times 100$

**Table S1.** The calculated results from CVs in absence of SOFs.

### CO stripping and EIS studies for PdNS and PdNS-SNFM

The linear sweep voltammograms (LSVs) for PdNS and PdNS-SNFM were provided at -0.3 to 0.1 V and 0.05 V.s<sup>-1</sup> (Fig.S1 A) as CO stripping. The current for CO stripping peak on PdNS-SNFM (= 47.65 mA.mg<sup>-1</sup><sub>Pd</sub>) was more than PdNS (= 33.23 mA.mg<sup>-1</sup><sub>Pd</sub>). In addition to, the CO peak potential for PdNS (= -0.10 V) was shifted to negative values for PdNS-SNFM (= -0.11 V).

The  $Q_{\text{CO ads}}$  were 29.07 and 20.19  $\text{mC}\cdot\text{cm}^{-2}$  for PdNS-SNFM and PdNS, respectively. They can be because of the CO removal on the Pd surface over the larger surface area. The roughness factor ( $r_f$ ) and the mass-specific surface area ( $A$ ) were calculated from LSVs using [S1].  $r_f$  and  $A$  was calculated for PdNS and PdNS-SNFM, (48.92 and 155.12) (69.21 and 223.27  $\text{m}^2\cdot\text{g}^{-1}$ ). A comparison proved that the SNFM existence in the role of support increases the surface area of PdNS.

Fig. S1 B illustrates the Nyquist curves of GCE/PdNS and GCE/PdNS-SNFM electrodes. The Nyquist curves detect a charge transfer process on the GCE/PdNS and GCE/PdNS-SNFM electrodes. The obtained data exhibited the resistances of charge transfer ( $R_{ct}$ ) on GCE/PdNS, and GCE/PdNS-SNFM electrodes were 60.22 and 16.24  $\Omega$ , respectively. On the other hands,  $R_{ct}$  for PdNS is decreased in the presence of SNFM. The exchange current ( $I_0$ ) for the electrodes were calculated by [S2]:

$$I_0 = \frac{R \times T}{n \times F \times R_{CT}} \quad (1)$$

The parameters are  $R$  gas constant,  $T$  absolute temperature,  $n$  the exchanged electrons number and  $F$  Faraday constant The  $I_0$  on GCE/PdNS and GCE/PdNS-SNFM was about 0.426 and 1.580 mA, correspondingly. It can be due to the higher rate of charge transfer.

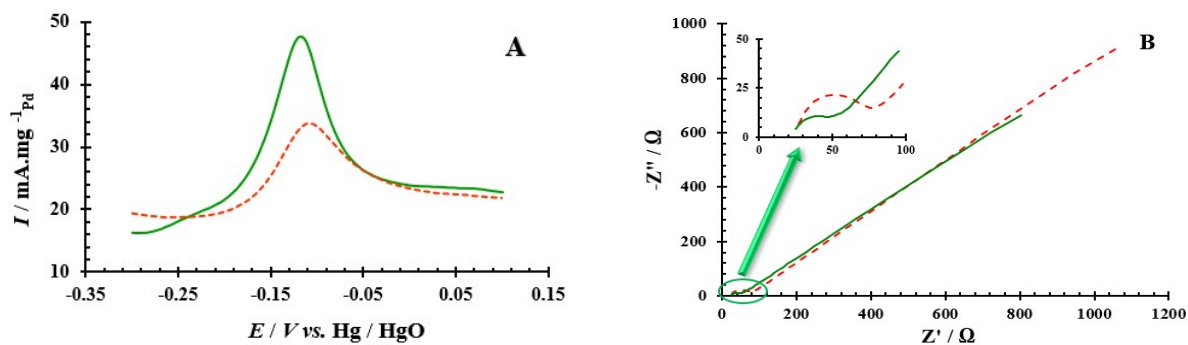

**Fig. S1** (A) CO stripping of in NaOH 1 M, and (B) Nyquist plots for (---) GCE/PdNS and (—) GCE/PdNS-SNFM electrodes in the solution of 0.005 M  $[\text{Fe}(\text{CN})_6]^{3-/4-}$  prepared in 0.1 M KCl over a frequency region of  $1 \times 10^{-1}$  to  $1 \times 10^5$  Hz at 0.30 V.

**Table S2.** The calculated results from CAs on GC/PdNS-SNFM.

The data of this work are comparable to other presented catalysts in article for electrooxidation reaction of different organic compounds as shown in Table S3 [S3-S9]. Up to Table S3, the  $I_f$  in SOF5 oxidation was much higher and peak potential ( $E_f$ ) SOF4 oxidation is lower than other fuels. Furthermore, the onset potential ( $E_{\text{onset}}$ ) SOF4 and SOF5 oxidation were more negative than the

other fuels. In order to

electrocatalyst

accumulate

intermediate, the ratio

|             | $I_{(t=0\text{ s})}$<br>(mA.mg <sup>-1</sup> <sub>Pd</sub> ) | $J_{(t=300\text{ s})}$<br>(mA.cm <sup>-2</sup> ) |
|-------------|--------------------------------------------------------------|--------------------------------------------------|
| 0.80 M SOF1 | 257.72                                                       | 9.87                                             |
| 0.55 M SOF2 | 1070.04                                                      | 33.11                                            |
| 0.55 M SOF3 | 535.13                                                       | 12.12                                            |
| 0.34 M SOF4 | 489.35                                                       | 2.23                                             |
| 0.43 M SOF5 | 1887.50                                                      | 51.89                                            |
| 0.85 M SOF6 | 210.72                                                       | 2.67                                             |

determine

tolerance to

carbonaceous

of  $I_f/I_b$  was calculated.

**Table S3.** The electrochemical parameter as estimated from CV curves for electrooxidation reaction of SOF on PdNS-PdNS and another catalyst.

| Electrocatalyst                                   | Fuels | Concentration (M) | Potential Range (V) | Reference Electrode | E <sub>onset</sub> (V) | E <sub>f</sub> (V) | I <sub>f</sub>              | E <sub>b</sub> (V) | I <sub>b</sub>             | I <sub>f</sub> / I <sub>b</sub> | Ref.         |
|---------------------------------------------------|-------|-------------------|---------------------|---------------------|------------------------|--------------------|-----------------------------|--------------------|----------------------------|---------------------------------|--------------|
| Pd/RGO                                            | SOF1  | 1                 | -0.8 to +0.4        | Ag/AgCl             | -0.34                  | -0.19              | 388 mA.mg <sup>-1</sup>     | -0.34              | 138.57 mA.cm <sup>-2</sup> | 2.8                             | [S3]         |
| Pd-PNMSS                                          | SOF1  | 0.20              | -1 to +0.7          | Hg/HgO              | -0.76                  | -0.09              | 97.48 mA.cm <sup>-2</sup>   | -0.38              | 12.53 mA.cm <sup>-2</sup>  | 7.78                            | [S2]         |
|                                                   | SOF2  | 20                | -1 to +0.7          | Hg/HgO              | -0.85                  | -0.09              | 157.90 mA.cm <sup>-2</sup>  | -0.38              | 40.19 mA.cm <sup>-2</sup>  | 3.93                            |              |
| Pd-Ag-NS                                          | SOF2  | 1                 | -0.7 to +0.2        | Hg/HgO              | -0.72                  | -0.20              | 2.34 mA.cm <sup>-2</sup>    | -0.28              | 1.02 mA.cm <sup>-2</sup>   | 2.28                            | [S4]         |
| Pd <sub>1</sub> Au <sub>1</sub> NSFs <sup>a</sup> | SOF3  | 0.50              | -0.8 to +0.4        | SCE                 | -                      | -0.08              | 355 mA.mg <sup>-1</sup>     | -                  | -                          | -                               | [S5]         |
| Pt@Pd NCs                                         | SOF3  | 0.50              | -0.8 to +0.4        | SCE                 | 0.026                  | -1.4               | 58.4 mA.cm <sup>-2</sup>    | -                  | -                          | -                               | [S6]         |
| Fe/FeZSM-5CPE                                     | SOF5  | 0.13              | 0 to +1             | SCE                 | -                      | 0.52               | 19.08 mA.cm <sup>-2</sup>   | 0.25               | -                          | -                               | [S7]         |
| Pt/CN <sub>x</sub> <sup>b</sup>                   | SOF5  | 1                 | 0 to +1             | Ag/AgCl             | 0.15                   | 0.72               | 301 mA.mg <sup>-1</sup>     | -                  | 485.48 mA.cm <sup>-2</sup> | 0.62                            | [S8]         |
|                                                   | SOF6  | 1                 | 0 to +1.1           | Ag/AgCl             | 0.00                   | 0.73               | 493 mA.mg <sup>-1</sup>     | -                  | -                          | 1.15                            |              |
| Pd <sub>10</sub> Bi <sub>1</sub> /C               | SOF6  | 0.50              | -0.2 to +1          | Ag/AgCl             | 0.08                   | 0.00               | 9.20 mA.cm <sup>-2</sup>    | -                  | -                          | -                               | [S9]         |
| PdNS-PdNS                                         | SOF1  | 0.80              | -1 to +0.7          | Hg/HgO              | -0.97                  | -0.05              | 308.45 mA.mg <sup>-1</sup>  | -0.35              | 43.91 mA.mg <sup>-1</sup>  | 7.02                            | In this work |
|                                                   | SOF2  | 0.55              |                     |                     | -0.94                  | -0.10              | 520.4 mA.mg <sup>-1</sup>   | -0.33              | 228.68 mA.mg <sup>-1</sup> | 2.28                            |              |
|                                                   | SOF3  | 0.55              |                     |                     | -0.98                  | +0.05              | 469.85 mA.mg <sup>-1</sup>  | -0.29              | 123.27 mA.mg <sup>-1</sup> | 3.81                            |              |
|                                                   | SOF4  | 0.34              |                     |                     | -0.98                  | -0.11              | 386.21 mA.mg <sup>-1</sup>  | -0.35              | 221.10 mA.mg <sup>-1</sup> | 1.75                            |              |
|                                                   | SOF5  | 0.43              |                     |                     | -1                     | +0.50              | 1130.29 mA.mg <sup>-1</sup> | -0.11              | 859.00 mA.mg <sup>-1</sup> | 1.31                            |              |
|                                                   | SOF6  | 0.85              | -0.3 to +1          | Ag/AgCl             | -0.23                  | +0.80              | 377.78 mA.mg <sup>-1</sup>  | -0.40              | 248.32 mA.mg <sup>-1</sup> | 1.52                            |              |

a. PdAu nanosnowflakes.  
b. Platinum-carbon nitride

### *Calculation of electrochemical factors for SOFs oxidation on PdNS-SNFM surface*

The SOFs electrooxidation on GCE/PdNS-SNFM electrode was a consideration under the difference conditions; whereas the electrochemical data as valued from CVs curves were reported as Table S4. In the test of SOF concentration (Fig. S2 A-F), with increasing SOF1-SOF6 concentration to 0.95, 1.37, 0.42, 0.59, 0.43 and 0.35 M, respectively, the current was increased. Nevertheless, any significant increase doesn't observe in SOF concentrations higher than mention concentration for every SOF. This is owing to the occupancy of active sites on the electrode surface. The logarithm  $I$  versus logarithm [SOF] is designed to calculate the order of reaction [S10]. The order of reaction gotten from the slope of the line for forward and backward scanning in SOF1-SOF6 oxidation (Inset Fig. S2 A-F) was recorded in Table S4. Base on Table S4, reaction order for the anodic sweep in SOF2 was more than other fuels and after that were SOF4, SOF3, SOF1, SOF6, and SOF5 respectively and in the anodic sweep, SOF5 was higher and after that were SOF1, SOF4, SOF3, SOF2, and SOF6 respectively. Consequently, measure SOF2 oxidation and intermediate of SOF5 oxidation was higher than other fuels.

The temperature effect on the forward and backward currents in different temperatures between 20 and 60 °C was showed in Fig. S3 A-F. The forward and backward currents were enlarged with the increasing temperature. The relevance between Arrhenius and appropriate linear fit  $\ln I$  vs.  $T^{-1}$  delivered the activation energy ( $E_a$ ) for anodic and cathodic sweeps [S11]. The plots of  $\ln I$  vs.  $T^{-1}$  are shown in Inset Fig. S3 A-F. The values of  $E_a$  for SOF1-SOF6 electrooxidation at the anodic and cathodic sweep were calculated and recorded in Table S4. As it is clear, the  $E_a$  reduction order is as follows in the cathodic scan: SOF2>SOF1>SOF5>SOF4>SOF3>SOF6 and in the anodic scan: SOF3>SOF4>SOF2>SOF1>SOF5>SOF6. Thus, the oxidation of SOF6 and oxidation intermediates produced in SOF6 oxidation was faster than other fuels. As well, with accelerating

in the scanning, current was improved at forward and backward scanning (Fig. S4 A-F). By slope of the plots the  $I_f$  versus the square root of the sweep rate ( $v^{1/2}$ ) and the  $E_p$  versus  $\ln(v)$  (See Inset Fig. S4 A-F), electron transfer ( $\alpha$ ), and diffusion ( $D$ ) coefficients were calculated according to [S3] and reported in Table S4. Electron transfer in SOF3 with  $\alpha = 0.99$  and diffusion in SOF1 was more than in comparing with other SOF. The linear correlation among  $E_p$  and  $\ln(v)$  and  $I_f$  and  $v^{1/2}$  proved the SOF1-SOF6 oxidation is the irreversible charge transfer phenomenon, and the transport of SOF molecules from bulk solution to the electrode surface is as the rate determining step for total reaction, respectively.



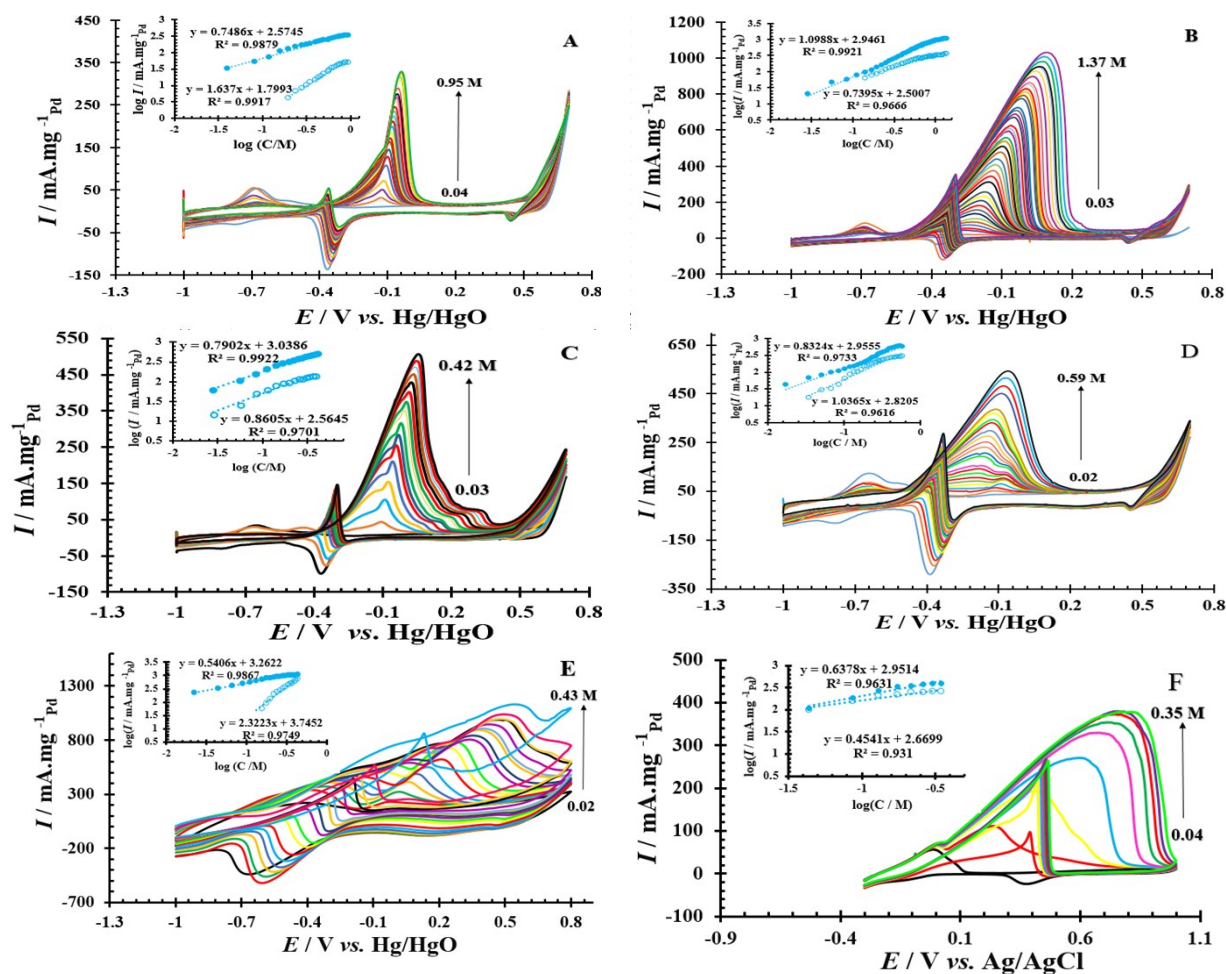

**Fig. S2.** CVs of SOF1-SOF6 oxidation (A-F) in various concentration (Inset: The plot of  $\log I_f$  in (●) anodic and (○) cathodic sweep vs.  $\log C$ ) on GCE/PdNS-SNFM electrode in 1 M NaOH for SOF1-SOF5 and 0.1 M  $\text{H}_2\text{SO}_4$  for SOF6 at 0.05  $\text{V}\cdot\text{s}^{-1}$  sweep rate.

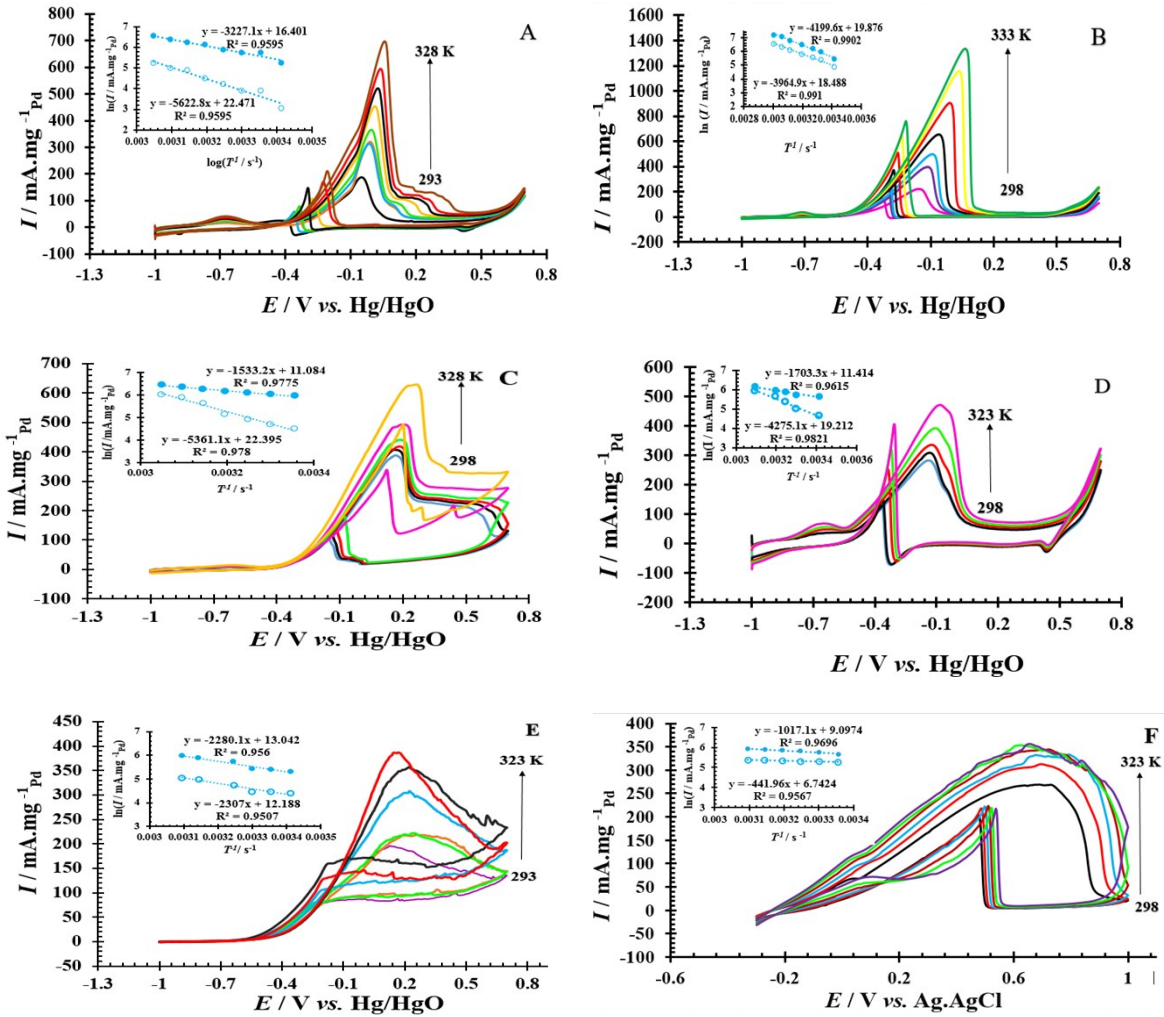

**Fig. S3.** CVs of SOF1-SOF6 electrooxidation (A-F) at various temperatures. (Inset: plot of  $\ln I_f$  in (●) anodic and (○) cathodic sweep vs.  $T^{-1}$  on GCE/PdNS-SNFM electrode in 1 M NaOH for SOF1-SOF5 and 0.1 M  $\text{H}_2\text{SO}_4$  for SOF6.

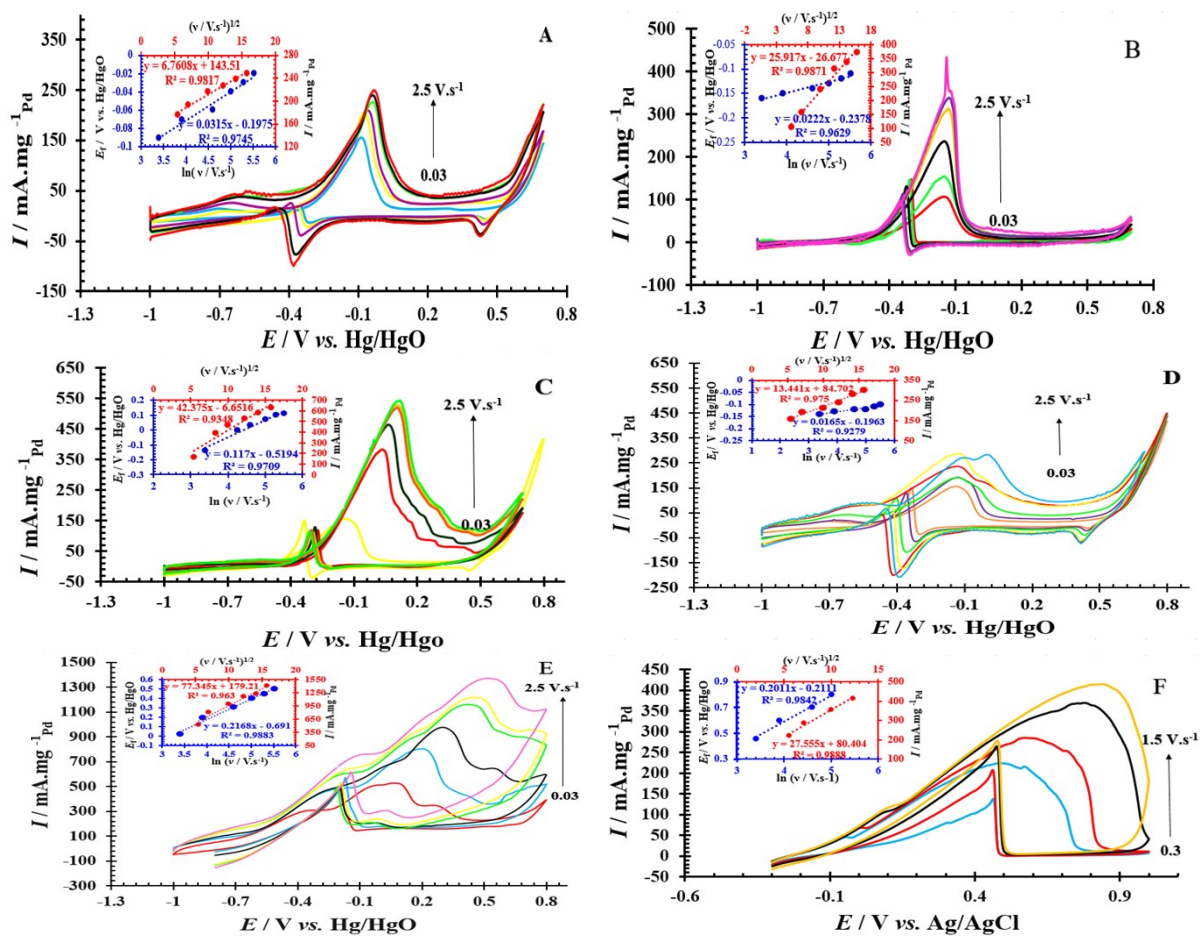

**Fig. S4.** CVs of SOF1-SOF6 electrooxidation (A-F) at various sweep rate (Inset: The plots of  $E_f$  vs.  $\ln v$  and  $I_f$  vs.  $v^{1/2}$ ) on the GCE/PdNS-SNFM electrode in 1 M NaOH for SOF1-SOF5 and 0.1 M  $H_2SO_4$  for SOF6.

**Table S4.** The investigation results effect of analyte concentration, temperature and scan rate on GCE/PdNS-SNFM electrode in liquid fuels electrooxidation.

| Fuel | Reaction Order <sup>a</sup> |                        | $E_a^b$ (kJ.mol <sup>-1</sup> )           |                                         | $\delta E_f / \delta \ln v$ | $\delta J_f / \delta v^{1/2}$ | $\alpha^c$ | $C$<br>(mol/cm <sup>3</sup> ) | $n^*$ | $D^{d*}$<br>(cm <sup>2</sup> /s) |
|------|-----------------------------|------------------------|-------------------------------------------|-----------------------------------------|-----------------------------|-------------------------------|------------|-------------------------------|-------|----------------------------------|
|      | Forward sweep               | Backward sweep         | Forward sweep                             | Backward sweep                          |                             |                               |            |                               |       |                                  |
| SOF1 | 0.74 ( $R^2 = 0.987$ )      | 1.63 ( $R^2 = 0.991$ ) | 26.83 ( $s^+ = -3227.1$ & $R^2 = 0.959$ ) | 29.87 ( $s = -5622.8$ & $R^2 = 0.959$ ) | 0.03 ( $R^2 = 0.974$ )      | 6.76 ( $R^2 = 0.981$ )        | 0.86       | 800                           | 6     | $4.23 \times 10^{-2}$            |
| SOF2 | 1.09 ( $R^2 = 0.992$ )      | 0.73 ( $R^2 = 0.966$ ) | 34.91 ( $s = -4199.6$ & $R^2 = 0.990$ )   | 32.96 ( $s = -3964.9$ & $R^2 = 0.991$ ) | 0.02 ( $R^2 = 0.962$ )      | 0.03 ( $R^2 = 0.987$ )        | 0.90       | 550                           | 12    | $2.10 \times 10^{-2}$            |
| SOF3 | 0.79 ( $R^2 = 0.992$ )      | 0.86 ( $R^2 = 0.970$ ) | 12.74 ( $s = -1533.2$ & $R^2 = 0.977$ )   | 44.57 ( $s = -5361.1$ & $R^2 = 0.978$ ) | 8.29 ( $R^2 = 0.970$ )      | 42.37 ( $R^2 = 0.934$ )       | 0.99       | 550                           | 10    | $6.60 \times 10^{-8}$            |
| SOF4 | 0.83 ( $R^2 = 0.973$ )      | 1.03 ( $R^2 = 0.961$ ) | 14.16 ( $s = -1703.3$ & $R^2 = 0.961$ )   | 35.54 ( $s = -4275.1$ & $R^2 = 0.982$ ) | 0.01 ( $R^2 = 0.927$ )      | 13.44 ( $R^2 = 0.975$ )       | 0.86       | 340                           | 18    | $3.43 \times 10^{-9}$            |
| SOF5 | 0.53 ( $R^2 = 0.996$ )      | 2.96 ( $R^2 = 0.959$ ) | 18.95 ( $s = -2280.1$ & $R^2 = 0.956$ )   | 19.18 ( $s = -2307.0$ & $R^2 = 0.950$ ) | 0.21 ( $R^2 = 0.988$ )      | 77.34 ( $R^2 = 0.963$ )       | 0.97       | 430                           | 4     | $4.59 \times 10^{-5}$            |
| SOF6 | 0.63 ( $R^2 = 0.963$ )      | 0.45 ( $R^2 = 0.931$ ) | 8.45 ( $s = -1017.1$ & $R^2 = 0.969$ )    | 3.67 ( $s = -441.9$ & $R^2 = 0.956$ )   | 0.20 ( $R^2 = 0.984$ )      | 27.55 ( $R^2 = 0.988$ )       | 0.94       | 850                           | 2     | $1.53 \times 10^{-6}$            |

a.  $\log I = n \log C + B$  { $n$ = reaction order,  $C$  = concentration and  $B$  = interception}

$$E_a = - \left( \frac{\delta \ln I_p}{\delta \left( \frac{1}{T} \right)} \times R \right)$$

b.  $\{E_a = \text{activation energy and } R = \text{gas constant}\}$

$$\alpha = 1 - \frac{R \times T}{\delta E_p}$$

c.  $\frac{\delta J_p}{\delta (\ln v)} \times n \times F$  { $\alpha$  = electron transfer coefficient,  $v$  = scan rate,  $R$  = gas constant,  $T = 293$  K,  $F$  = Faraday constant and  $n$  = electrons number transferred during oxidation of one mol analyte}

$$\left( \frac{\delta J_p}{\delta v^{1/2}} \right)^2 \times R \times T$$

d.  $D = \frac{\left( \frac{\delta J_p}{\delta v^{1/2}} \right)^2 \times R \times T}{2.46 \times 10^{-7} \times (n \times F)^3 \times \alpha \times C^2}$  { $D$  = diffusion coefficient and  $C$  = concentration}

\* If the oxidation reaction be complete (to produce CO<sub>2</sub>), and not partial oxidation.

# R-squared in linear fitting

+ Slop of fitted line

## References

- [S1] Zhang, L.Y.; Zhao, Zh. L.; Li, Ch.M. Formic acid-reduced ultrasmall Pd nanocrystals on graphene to provide superior electrocatalytic activity and stability toward formic acid oxidation. *Nano Energy* 2015, 11, 71-77.
- [S2]. Kaed, F.; Yavari, Z.; Noroozifar, M.; Saravani, H.. Promoted electrocatalytic ability of the Pd on doped Pt in NiO-MgO solid solution toward methanol and ethanol oxidation. *J. Electroanal. Chem.* 2018, 827, 204-212.
- [S3]. Yang, F.; Zhang, B.; Dong, S.; Tang, Y.; Hou, L.; Chen, Zh.; Li, Z.; Yang, W.; Xu, Ch.; Wang, M.; Li, Y. Silica nanosphere supported palladium nanoparticles encapsulated with graphene: High-performance electrocatalysts for methanol oxidation reaction. *Appl. Surf. Sci.* 2018, 452, 11–18.
- [S4]. Peng, Ch.; Hu. Y.; Liu, M.; Zheng, Y. Hollow raspberry-like PdAg alloy nanospheres: High electrocatalytic activity for ethanol oxidation in alkaline media. *J. Power Sources* 2015, 278, 69-75.
- [S5]. Zh. Z. Yang.; L. Liu.; A.J. Wang.; Yuan, J.; Feng, J.J.; Q. Qing Xu. Simple wet-chemical strategy for large-scaled synthesis of snowflake-like PdAu alloy nanostructures as effective electrocatalysts of ethanol and ethylene glycol oxidation. *J. Int. J. Hydrogen Energy* 2017, 42, 2034-2044.
- [S6]. Li, D. N.; He, Y. M.; Feng, J. J.; Zhang, Q. L.; Zhang, L.; Wu, L.; Wang, A. J. Facile synthesis of prickly platinum-palladium core-shell nanocrystals and their boosted electrocatalytic activity towards polyhydric alcohols oxidation and hydrogen evolution. *J. Colloid Interface Sci.* 2018, 514, 476-483.

- [S7]. Abrishamkar, M.; Barootkoob, M.. Electrooxidation of formaldehyde as a fuel for fuel cells using Fe<sup>2+</sup>-nano-zeolite modified carbon paste electrode. *Int. J. Hydrogen Energy* 2017, 42, 23821-23825.
- [S8]. Sadhukhan, M.; Kundu, M. K.; Bhowmik, T.; Barman, S. Highly dispersed platinum nanoparticles on graphitic carbon nitride: A highly active and durable electrocatalyst for oxidation of methanol, formic acid and formaldehyde. *Int. J. Hydrogen Energy* 2017, 42, 9371-9383.
- [S9]. Yang, S.; Yang, J.; Chung, Y. Pd-Bi bimetallic catalysts including polyvinylpyrrolidone surfactant inducing excellent formic acid oxidation reaction and direct formic acid fuel cell performance. *Int. J. Hydrogen Energy* 2017, 42, 17211-17220.
- [S10]. Wang, E. D.; Xu, J. B.; Zhao, T. S. Density functional theory studies of the structure sensitivity of ethanol oxidation on palladium surfaces. *J. Phys. Chem. C* 2010, 114, 10489-10497.
- [S11]. Haghnegahdar, S.; Noroozifar, M. Deposition of PdPtAu nanoparticles on hollow nanospheres of Fe<sub>3</sub>O<sub>4</sub> as a new catalyst for methanol electrooxidation: Application in direct methanol fuel cell. *Electroanalysis* 2017, 29, 1-11.
